# Supplementary material for: Electrotherapy Treatments Performed in the Area of the Throat and Larynx and the Level of TSH, FT3 and FT4 Hormones: A Randomized Controlled Trial
Source: Research Square preprint supplement (doi:10.21203/rs.3.rs-362424/v1), 2021-04-23
Supplement: Supplementary file 1 [file ebaca357bdc46ef8f0820b58.docx]

Appendix A. Faraday's first law of electrolysis

| m = k . i . t | Faraday's first law of electrolysis |
| --- | --- |
| m | mass of substance evolved on the electrode |
| i | the amperage of current flowing in the circuit |
| t | current flow time |
| k = R/F | electrochemical equivalent [kKI = 0,00172020725] |
| R | chemical equivalent, i.e. the mass of 1 mole [MmolKI = 166g/mol] |
| F | The Faraday constant [F = 96 500 C] |

Appendix B. Examined hormones

| TSH [µIU/ml] | micro international unit /mililiter |
| --- | --- |
| FT3 [pg/ml] | picogram/mililiter |
| FT4 [pg/ml] | picogram/mililiter |
